# Supplementary material
Source: HighWire-hosted journal article supplement (http://ajnr-stage2.highwire.org/highwire/filestream/52712/field_highwire_adjunct_files/0/15-00687.pdf)
Supplement: 15-00687.pdf [file 15-00687.pdf]

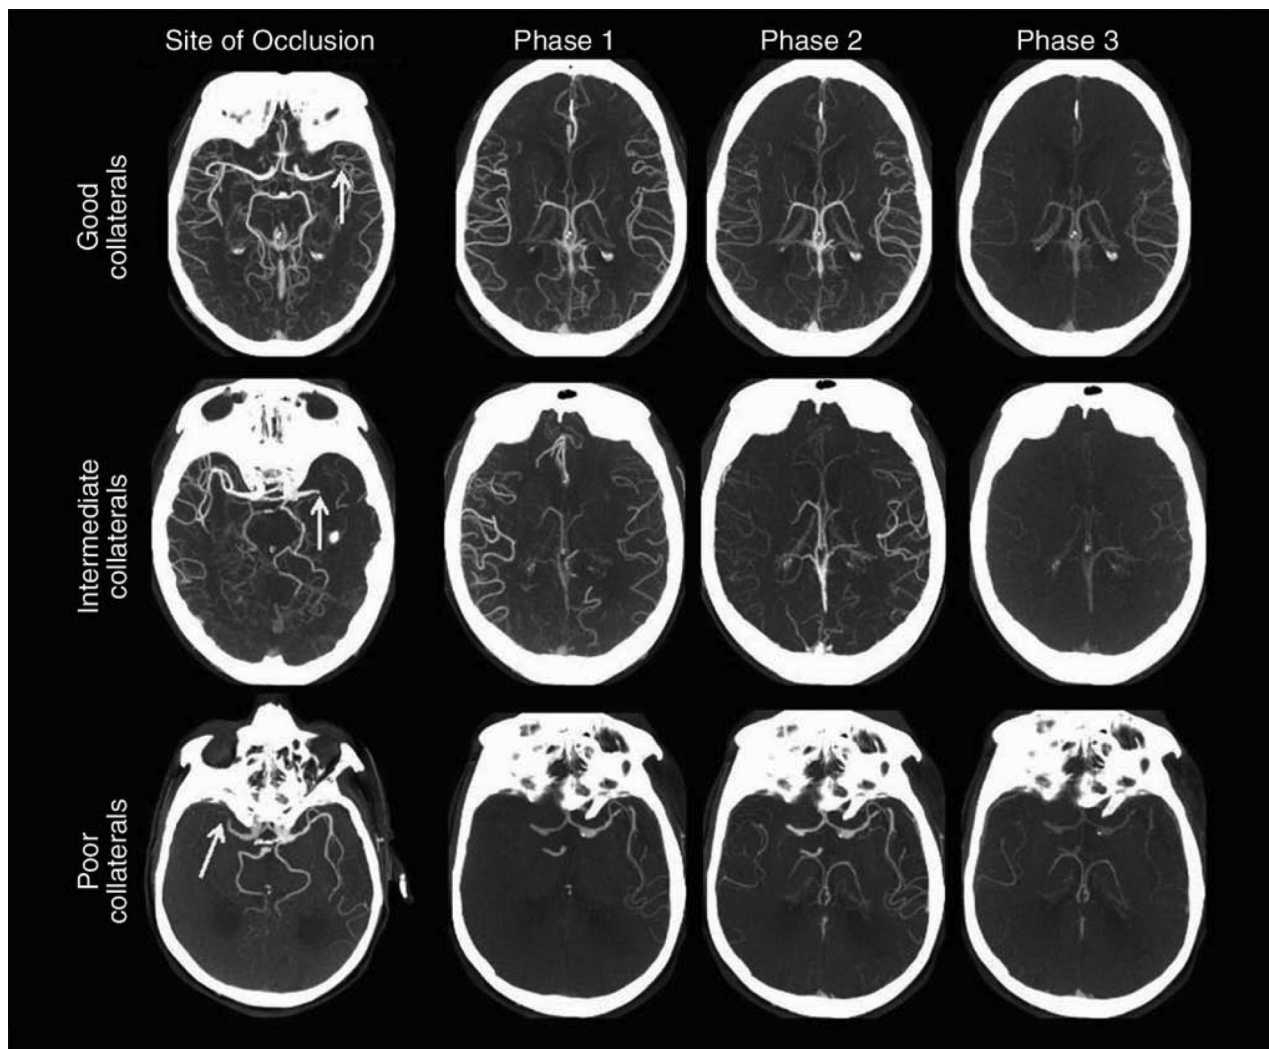

**ON-LINE FIGURE.** Multiphase CTA in patients with M1 occlusion (arrow) with good collaterals (*top row*), intermediate collaterals (*middle row*), and poor collaterals (*bottom row*) as demonstrated by the degree of backfilling of the arteries beyond the occlusion. Reprinted with permission from Menon BK, d'Esterre CD, Qazi EM, et al. **Multiphase CT angiography: a new tool for the imaging triage of patients with acute ischemic stroke.** *Radiology* 2015;275:510–20.
